# Supplementary material for: Altered Distribution and Expression of Syndecan-1 and -4 as an Additional Hallmark in Psoriasis
Source: MDPI journal article supplement (doi:10.3390/ijms23126511), 2022-06-10
Supplement: s1 [file s1]

Supplementary Figure

(a)

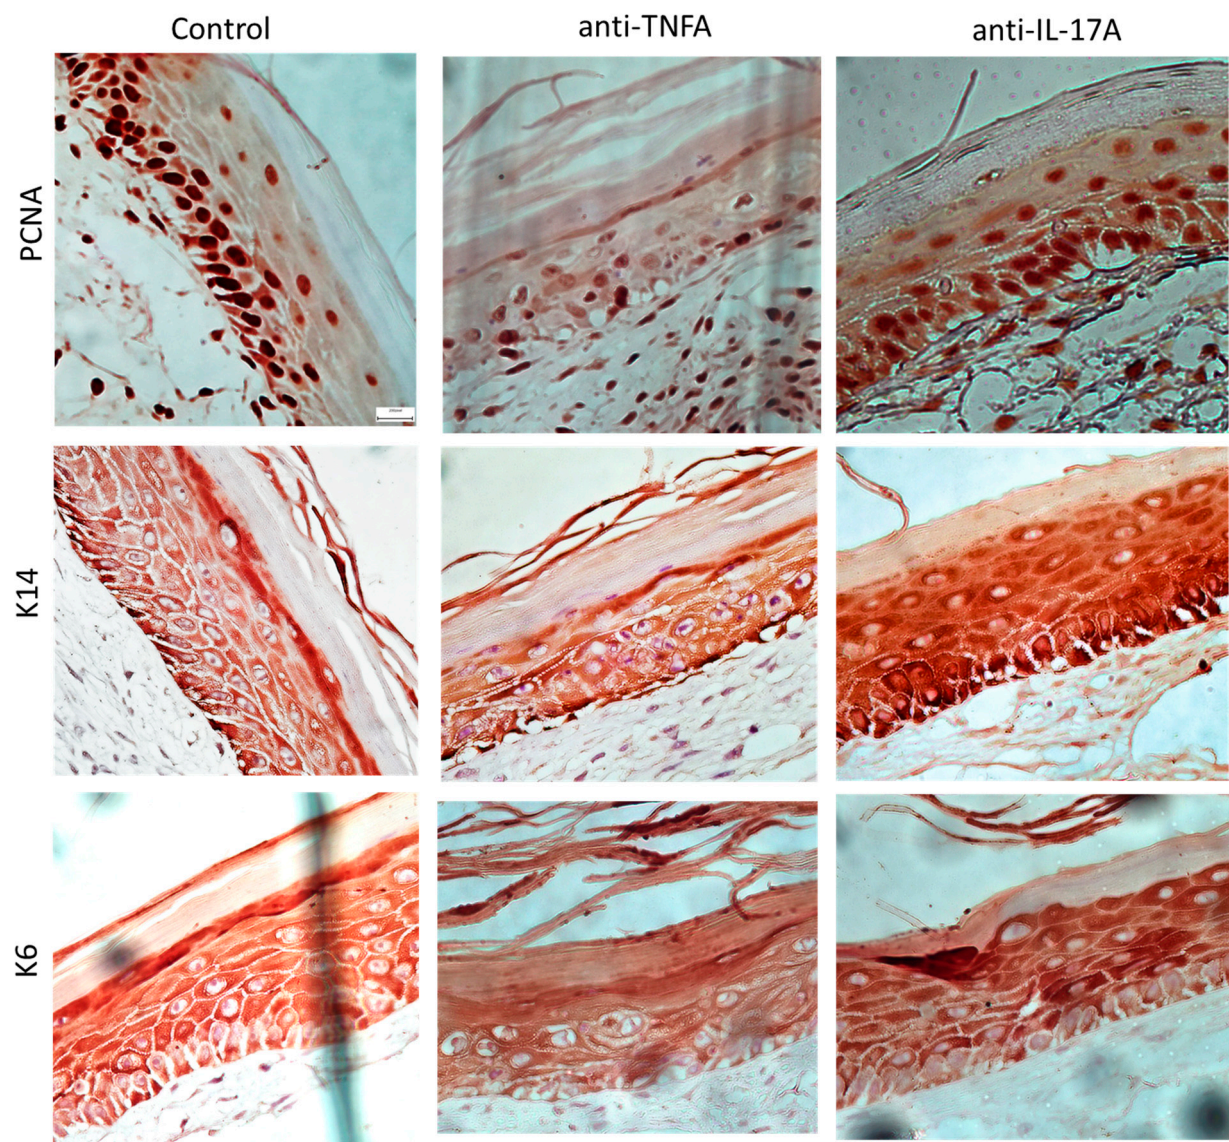

(b)

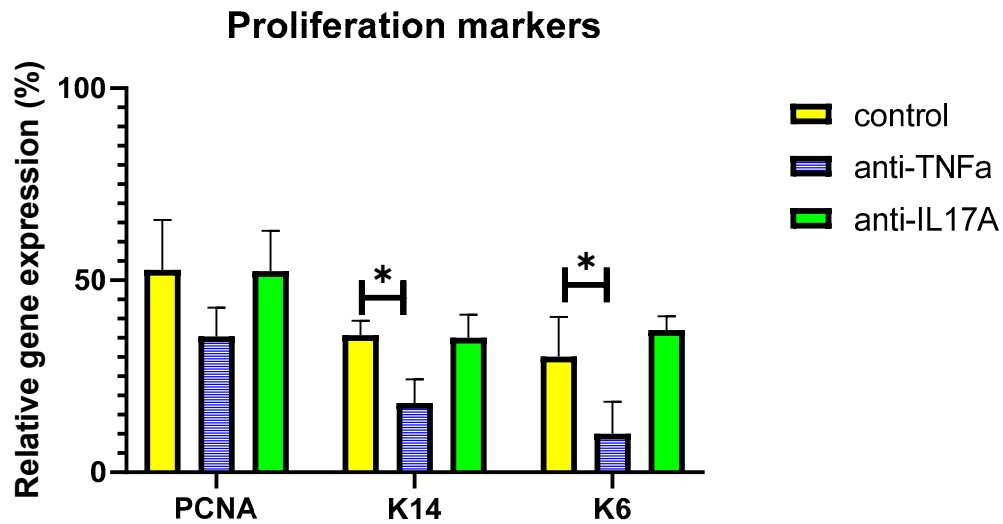

**Figure S1.** Proliferation activity of epidermal cells after treatment with TNFα or IL17-A blockers in a 3D full-thickness skin model. (a) Immunohistochemical staining against PCNA proliferation marker, keratin-14 as a marker of undifferentiated dividing keratinocytes in the basal epidermis and keratin-6 as a marker of “activated” keratinocytes of the upper layers. (b) Statistical analysis of staining quantification expressed as the % score of positive cells/total number of counted cells. Three images corresponding to three independent experiments were analyzed per condition. mean± SD, t-student test, \*p<0,05.
